# Supplementary material for: Association Study of the Caspase Gene Family and Psoriasis Vulgaris Susceptibility in Northeastern China
Source: Hindawi journal article supplement (doi:10.1155/2019/2417612), 2019-02-17
Supplement: f1 [file 2417612.f1.zip]

Table S1 Genotyping primers.

| Gene  | SNP        | PCR primer (5'-3')          | PCR primer (3'-5')      | Gene |
|-------|------------|-----------------------------|-------------------------|------|
| CASP1 | rs2282659  | GCAGGAGCGGGGTGAAACTA        | GACATCCCACAATGGGCTCTG   | 320  |
| CASP3 | rs2705897  | CCATGGCTCAGAAGCACACAAA      | CGTGCCCCAGGTTAGGTTAAGA  | 192  |
|       | rs4647610  | TGGAGGATCTCGGATGCCTTTT      | TGAGCATCGGTATAAGCCCTGAA | 299  |
| CASP4 | rs547584   | TCCATCTGTGACATCTTAGTCTATTAC | AAGCCAGATCGCGTGGTTCTATG | 167  |
|       |            | CA                          |                         |      |
|       | rs672016   | GGACAGGGGCCATGAACTACA       | TGCACATTGGGTTGGCAGTG    | 362  |
| CASP5 | rs507879   | CTGCATGGGCCTTGGAGTTG        | GCAAAACACGATGTTCTGACATT | 242  |
|       |            |                             | GA                      |      |
| CASP6 | rs5030545  | CCTCCTGGAAGTCCCCAAG         | TGTGCTCACCTAGGGCAAAGG   | 313  |
| CASP7 | rs17090911 | TGCCACTGCAACTCCCATCTAA      | AGGGTGACGCTGGGTTTCTTC   | 228  |
|       | rs2227310  | CCTGGTTTGTGCAAGCCCTCT       | TTGGTGAGCATGGAGACCACAC  | 175  |
| CASP8 | rs6704688  | TCGTGCCTCAAGGAGAGGAGAA      | TGATTCAGTCATCGTAGATTGGA | 387  |
|       |            |                             | AGG                     |      |
|       | rs2293554  | GGGTTGAATGGACAGCCTCTGA      | TTCCCAAAGCCTCCCAAGTGAT  | 230  |
| CASP9 | rs4233532  | TCAGGCAGAGGAGAGGCAAGTG      | GCCCACACCCAGTGACATCTTT  | 285  |
|       | rs1052576  | TGGCTCCCAAGAAAACAACAGG      | CCTATCCGTGCTTCTGGCTCAC  | 289  |
| CASP1 | rs12613347 | TTTCAGTGCCACATTGTCAGT       | ACCCGCCACCTCATATTGTCA   | 265  |
| 0     |            |                             |                         |      |
|       | rs13006529 | TCGAAGAGTGGACAAACAGGGAAC    | AGGGTGACGCTGGGTTTCTTC   | 172  |
| CASP1 | rs506601   | TCCCAGCCTTGTCAGCAGAGAT      | TGTGGGACCAAAGATGAAAAGC  | 439  |
| 2     |            |                             | ATA                     |      |
| CASP1 | rs3181304  | GAGCTGCCAGTTCAGCCATGAG      | CACACACACAGCAAGTGCTGTG  | 346  |
| 4     |            |                             | A                       |      |

Table S2 iMLDR probe sequences.

| Gene  | Snps Allele        | Primer (5'-3')                                         | LDR product |
|-------|--------------------|--------------------------------------------------------|-------------|
| CASP1 | rs2282659_modify:  | CTCCAAAACCTCTTTGGAAAGAAGAGCTTTTTTTTTTTTTTTTTTTT        | 64.78       |
|       | rs2282659_A:       | TACGGTTATTCGGGCTCCTGTCTGGGTTGTCCACTCTCCAAACAA          | 66.69       |
|       | rs2282659_G:       | TTCCGCGTTCGGACTGATATCTGGGTTGTCCACTCTCCAAACAG           | 66.41       |
| CASP3 | rs2705897_modify:  | AAAGACATTTGCAAATAAAAGGAAAAAAATTTTTTTTTTTTTTTTTTTT      | 63.19       |
|       | rs2705897_G:       | TCTCTCGGGTCAATTCGTCCTTTTCCTTTTGCTGTGATCTCTTAGAAACAGG   | 68.02       |
|       | rs2705897_T:       | TGTTCTGGGCGGATTAGTTCCTTTTGCTGTGATCTCTTAGAAACAGT        | 66.22       |
| CASP3 | rs4647610_modify:  | AGTAGCATTTATCAITTTGATATTTGCACCTTTTTTTTTTTTTTTTTTTTTT   | 63.47       |
|       | rs4647610_C:       | TTCCGCGTTCGGACTGATATGGAAGACTGAAACTGCCAAAACCTCAGAGTC    | 68.69       |
|       | rs4647610FT:       | TACGGTTATTCGGGCTCCTGTGGAAGACTGAAACTGCCAAAACCTCAGAGTT   | 68.18       |
| CASP4 | rs547584_modify:   | TAATATGCTTAAATTAGGTTTACAAAGATCACATTTTTTTTTTTTTTTTTTTT  | 63.20       |
|       |                    | TT                                                     |             |
|       | rs547584_C:        | TCTCTCGGGTCAATTCGTCCTTGAAGCCTTTCTAGTGCTTTAGAAAAAGTA    | 66.24       |
|       |                    | G                                                      |             |
|       | rs547584_T:        | TGTTCTGGGCGGATTAGTGGAAGCCTTTCTAGTGCTTTAGAAAAAGCAA      | 66.45       |
| CASP4 | rs672016_modify:   | TAGCCCAAGTAGCCGCCTAGTTTTTTTTTTTT                       | 63.44       |
|       | rs672016_C:        | TACGGTTATTCGGGCTCCTGTTCAGCGATGGATCCAGATGC              | 67.02       |
|       | rs672016_G:        | TTCCGCGTTCGGACTGATATCCAGCGATGGATCCAGATGG               | 66.87       |
| CASP5 | rs507879_modify:   | ATCATAATATTTTTCTTTTCCTCTTCCTTCAITTTTTTTTTTTTTTTTTTTTTT | 63.53       |
|       |                    | T                                                      |             |
|       | rs507879_C:        | TTCCGCGTTCGGACTGATATCAGGGCCTTGCTTCAATTTTGC             | 68.70       |
|       | rs507879_T:        | TACGGTTATTCGGGCTCCTGTTCAGGGCCTTGCTTCAATTTTCGT          | 66.44       |
| CASP6 | rs5030545_modify:  | GGGAGGACCAGTTGGAGAGGTTTTTTT                            | 63.30       |
|       | rs5030545_C:       | TTCCGCGTTCGGACTGATATGCTTTCTCATCTGCCATGCATCG            | 70.38       |
|       | rs5030545_T:       | TACGGTTATTCGGGCTCCTGTGCTTTCTCATCTGCCATGCACCA           | 69.00       |
| CASP7 | rs17090911_modify: | CTGATCYGGTGAGTTGTTACCCTTTTTTTT                         | 63.64       |
|       | rs17090911_A:      | TGTTCTGGGCGGATTAGTCGTCCACCGTCCCGTGTCTAT                | 72.85       |
|       | rs17090911_G:      | TCTCTCGGGTCAATTCGTCCTTCGTCCACCGTCCCGTGTCTAC            | 73.59       |
| CASP7 | rs2227310_modify:  | CTGGAATCATGTCATCCTCACTTTTTTTTTTTT                      | 63.13       |
|       | rs2227310_C:       | TACGGTTATTCGGGCTCCTGTCTGGAGGAGCACGGAACAC               | 66.54       |
|       | rs2227310_G:       | TTCCGCGTTCGGACTGATATCCTGGAGGAGCACGGAACACAG             | 66.61       |
| CASP8 | rs6704688_modify:  | TAGTTAGGCTAAGTAAGAAAGAGAGAAGACTCAAATTTTTTTTTTTTTTTTTT  | 63.69       |
|       |                    | TTTT                                                   |             |
|       | rs6704688_C:       | TTCCGCGTTCGGACTGATATGTTTTTTGAAAAGATAAACAAAATCAACAAATA  | 67.81       |
|       |                    | CC                                                     |             |
|       | rs6704688_T:       | TACGGTTATTCGGGCTCCTGTGTTTTTTGAAAAGATAAACAAAATCAACAAAT  |             |
|       |                    | GCT                                                    |             |
| CASP8 | rs2293554_modify:  | AAGCYCCAATCAGCTCAGAGGTTTTTTTTTTTTTT                    | 65.10       |
|       | rs2293554_G:       | TTCCGCGTTCGGACTGATATGGCACTAGGCAGGGTACCACAAACAC         | 68.42       |
|       | rs2293554_T:       | TACGGTTATTCGGGCTCCTGTGGCACTAGGCAGGGTACCACAAACAA        | 68.71       |
| CASP9 | rs4233532_modify:  | GCGCATCCTTGCCCGCTCAGTTTTTTT                            | 72.65       |
|       | rs4233532_C:       | TTCCGCGTTCGGACTGATATGGCGCAGGCCTCCTTGCAGC               | 3.77        |

|        |                    |                                                       |       |
|--------|--------------------|-------------------------------------------------------|-------|
|        | rs4233532_T:       | TACGGTTATTCGGGCTCCTGTGGCGCAGGCCTCCTTGCTGT             | 71.33 |
| CASP9  | rs1052576_modify:  | GCAGGACCACGGTGCTCTGGTTTTTTT                           | 70.08 |
|        | rs1052576_T:       | TGTTTCGTGGGCCGGATTAGTGCTTTGCTGGAGCTGGCTCA             | 68.80 |
|        | rs1052576_C:       | TCTCTCGGGTCAATTCGTCCTTGCTTTGCTGGAGCTGGCACG            | 66.35 |
| CASP10 | rs12613347_modify: | GCTCACAAATTTCCAGTGCTAGGTTTTTTTTTTTTTTTTTTT            | 63.04 |
|        | rs12613347_C:      | TTCCGCGTTCGGACTGATATCTCTCCCAAGTTGGGGCAACC             | 68.77 |
|        | rs12613347_T:      | TACGGTTATTCGGGCTCCTGTCTCTCCCAAGTTGGGGCAGCT            | 66.45 |
| CASP10 | rs13006529_modify: | TATAGCAGAGAGTTTTTGTGGTTCTTAGACCTTTTTTTTTTTTTTTTTT     | 64.92 |
|        | rs13006529_A:      | TCTCTCGGGTCAATTCGTCCTTTGCCCTGGATGCACTTTGAA            | 68.12 |
|        | rs13006529_T:      | TGTTTCGTGGGCCGGATTAGTTGCCCTGGATGCACTTTGAT             | 67.10 |
| CASP12 | rs506601_modify:   | CTTCACAATGTGTGACAAACATTTTAAAAATTTTTTTTTTTTTTTTTTTT    | 63.25 |
|        | rs506601_A:        | TTCCGCGTTCGGACTGATATCTTAAAAATTATAATTGATAATTGCTTTATTGA | 58.43 |
|        |                    | A                                                     |       |
|        | rs506601_T:        | TACGGTTATTCGGGCTCCTGTCTTAAAAATTATAATTGATAATTGCTTTATTG | 57.85 |
|        |                    | AT                                                    |       |
| CASP14 | rs3181304_modify:  | CCATTGCTGTTAAGCACCTAGAGCTTTTTTTTTTTTTTTTTTTT          | 63.47 |
|        | rs3181304_A:       | TACGGTTATTCGGGCTCCTGTGGGATCCTAAAACCTACCTGGGACA        | 66.27 |
|        | rs3181304_G:       | TTCCGCGTTCGGACTGATATGGGATCCTAAAACCTACCTGGGACG         | 67.56 |

---

Table S3. Non-significant results of intergenic interaction analysis of all samples

| SNP(Chr)       | SNP(Chr)       | OR_INT   | Chi-square | P        |
|----------------|----------------|----------|------------|----------|
| rs12613347(2)  | rs672016(11)   | 1.87088  | 6.89948    | 0.008622 |
| rs13006529(2)  | rs506601(11)   | 0.380435 | 6.67732    | 0.009765 |
| rs13006529(2)  | rs4647610(4)   | 3.02893  | 6.06429    | 0.01379  |
| rs4233532(1)   | rs13006529(2)  | 0.433298 | 4.97048    | 0.02578  |
| rs6704688(2)   | rs4647610(4)   | 0.54489  | 4.64764    | 0.0311   |
| rs12613347(2)  | rs2282659(11)  | 0.413222 | 4.62179    | 0.03157  |
| rs506601(11)   | rs2282659(11)  | 0.433815 | 4.58316    | 0.03229  |
| rs6704688(2)   | rs672016(11)   | 0.579687 | 4.53809    | 0.03315  |
| rs13006529(2)  | rs2227310(10)  | 1.90046  | 3.58744    | 0.05822  |
| rs2227310(10)  | rs2282659(11)  | 0.54177  | 3.31672    | 0.06858  |
| rs4647610(4)   | rs672016(11)   | 0.632569 | 3.03089    | 0.08169  |
| rs17090911(10) | rs2282659(11)  | 0.589216 | 2.83441    | 0.09226  |
| rs13006529(2)  | rs17090911(10) | 1.67234  | 2.76846    | 0.09614  |
| rs4647610(4)   | rs2282659(11)  | 0.520418 | 2.57828    | 0.1083   |
| rs13006529(2)  | rs2282659(4)   | 0.307957 | 2.41556    | 0.1201   |
| rs2227310(10)  | rs547584(11)   | 1.44416  | 2.39628    | 0.1216   |
| rs12613347(2)  | rs6704688(2)   | 0.676949 | 2.25926    | 0.1328   |
| rs506601(11)   | rs507879(11)   | 0.695608 | 2.20244    | 0.1378   |
| rs506601(11)   | rs547584(11)   | 0.639831 | 2.09245    | 0.148    |
| rs672016(11)   | rs507879(11)   | 0.691495 | 2.03727    | 0.1535   |
| rs1052576(1)   | rs17090911(10) | 0.771038 | 2.01856    | 0.1554   |
| rs672016(11)   | rs2282659(11)  | 0.61121  | 1.91344    | 0.1666   |
| rs4233532(1)   | rs2227310(10)  | 1.28171  | 1.84207    | 0.1747   |
| rs5030545(4)   | rs547584(11)   | 0.730925 | 1.82892    | 0.1763   |
| rs4233532(1)   | rs2705897(4)   | 0.763966 | 1.68777    | 0.1939   |
| rs4233532(1)   | rs4647610(4)   | 1.33038  | 1.5287     | 0.2163   |
| rs4233532(1)   | rs672016(11)   | 0.742534 | 1.51538    | 0.2183   |
| rs2293554(2)   | rs3181304(19)  | 0.77683  | 1.49299    | 0.2218   |
| rs1052576(1)   | rs13006529(2)  | 1.45051  | 1.4818     | 0.2235   |
| rs12613347(2)  | rs506601(11)   | 0.756185 | 1.47068    | 0.2252   |
| rs13006529(2)  | rs547584(11)   | 1.72357  | 1.46928    | 0.2255   |
| rs12613347(4)  | rs4647610(4)   | 0.725222 | 1.46773    | 0.2257   |
| rs4647610(4)   | rs507879(11)   | 0.710117 | 1.3907     | 0.2383   |
| rs1052576(1)   | rs6704688(2)   | 1.26616  | 1.37666    | 0.2407   |
| rs6704688(2)   | rs17090911(10) | 1.26762  | 1.3755     | 0.2409   |
| rs1052576(1)   | rs2282659(11)  | 0.695662 | 1.36046    | 0.2435   |
| rs507879(11)   | rs3181304(19)  | 1.33232  | 1.24832    | 0.2639   |
| rs6704688(2)   | rs2282659(11)  | 0.639381 | 1.23578    | 0.2663   |
| rs5030545(4)   | rs2282659(11)  | 1.36171  | 1.11458    | 0.2911   |
| rs2227310(10)  | rs672016(11)   | 0.805169 | 1.10649    | 0.2928   |
| rs13006529(2)  | rs2705897(4)   | 1.4222   | 0.948353   | 0.3301   |
| rs13006529(2)  | rs2293554(2)   | 1.52215  | 0.946049   | 0.3307   |

|                |               |          |          |        |
|----------------|---------------|----------|----------|--------|
| rs1052576(1)   | rs507879(11)  | 1.2219   | 0.939305 | 0.3325 |
| rs2227310(10)  | rs506601(11)  | 0.826337 | 0.937518 | 0.3329 |
| rs2293554(2)   | rs5030545(4)  | 1.1738   | 0.934169 | 0.3338 |
| rs4233532(1)   | rs506601(11)  | 1.20323  | 0.925688 | 0.336  |
| rs12613347(2)  | rs547584(11)  | 0.780187 | 0.92355  | 0.3365 |
| rs506601(11)   | rs3181304(19) | 0.783453 | 0.884717 | 0.3469 |
| rs6704688(2)   | rs2227310(10) | 0.811948 | 0.84905  | 0.3568 |
| rs5030545(4)   | rs4647610(4)  | 1.22329  | 0.820584 | 0.365  |
| rs2293554(2)   | rs547584(11)  | 1.22551  | 0.779388 | 0.3773 |
| rs507879(11)   | rs2282659(11) | 0.699858 | 0.764556 | 0.3819 |
| rs17090911(10) | rs507879(11)  | 1.19558  | 0.755069 | 0.3849 |
| rs2705897(4)   | rs4647610(4)  | 1.25383  | 0.722399 | 0.3954 |
| rs2293554(2)   | rs2282659(11) | 1.29398  | 0.714354 | 0.398  |
| rs2705897(4)   | rs547584(11)  | 0.797241 | 0.691812 | 0.4055 |
| rs17090911(10) | rs547584(11)  | 1.22151  | 0.691342 | 0.4057 |
| rs6704688(2)   | rs2705897(4)  | 0.809578 | 0.671583 | 0.4125 |
| rs6704688(2)   | rs5030545(4)  | 0.840171 | 0.66854  | 0.4136 |
| rs547584(11)   | rs672016(11)  | 0.814932 | 0.667406 | 0.414  |
| rs12613347(2)  | rs507879(11)  | 0.810081 | 0.657286 | 0.4175 |
| rs4233532(1)   | rs6704688(2)  | 1.1792   | 0.636437 | 0.425  |
| rs2293554(2)   | rs672016(11)  | 1.17678  | 0.615379 | 0.4328 |
| rs6704688(2)   | rs547584(11)  | 0.813053 | 0.577134 | 0.4474 |
| rs506601(11)   | rs672016(11)  | 0.840128 | 0.576201 | 0.4478 |
| rs2227310(10)  | rs3181304(19) | 0.84311  | 0.574135 | 0.4486 |
| rs6704688(2)   | rs3181304(19) | 1.20849  | 0.565634 | 0.452  |
| rs1052576(1)   | rs547584(11)  | 1.18922  | 0.562924 | 0.4531 |
| rs547584(11)   | rs2282659(11) | 0.758866 | 0.498677 | 0.4801 |
| rs2705897(4)   | rs672016(11)  | 0.825742 | 0.492009 | 0.483  |
| rs1052576(1)   | rs2705897(4)  | 1.14044  | 0.490512 | 0.4837 |
| rs4233532(1)   | rs507879(11)  | 1.15808  | 0.464579 | 0.4955 |
| rs12613347(2)  | rs3181304(19) | 1.17661  | 0.455737 | 0.4996 |
| rs2705897(4)   | rs2227310(10) | 1.15699  | 0.449123 | 0.5028 |
| rs17090911(10) | rs672016(11)  | 0.873979 | 0.445031 | 0.5047 |
| rs2293554(2)   | rs506601(11)  | 1.13376  | 0.412371 | 0.5208 |
| rs1052576(1)   | rs672016(11)  | 0.875703 | 0.391196 | 0.5317 |
| rs5030545(4)   | rs507879(11)  | 0.880494 | 0.353504 | 0.5521 |
| rs1052576(1)   | rs2227310(10) | 1.1122   | 0.336675 | 0.5618 |
| rs2282659(11)  | rs3181304(19) | 1.26445  | 0.328156 | 0.5667 |
| rs13006529(2)  | rs3181304(19) | 1.24908  | 0.323238 | 0.5697 |
| rs5030545(4)   | rs506601(11)  | 0.901631 | 0.317042 | 0.5734 |
| rs5030545(4)   | rs2227310(10) | 0.909314 | 0.306921 | 0.5796 |
| rs13006529(2)  | rs6704688(2)  | 0.802571 | 0.304457 | 0.5811 |
| rs2705897(4)   | rs507879(11)  | 0.869665 | 0.277022 | 0.5987 |
| rs2705897(4)   | rs2282659(11) | 1.19926  | 0.262991 | 0.6081 |

|                |                |          |          |        |
|----------------|----------------|----------|----------|--------|
| rs6704688(2)   | rs2293554(2)   | 0.900894 | 0.248531 | 0.6181 |
| rs5030545(4)   | rs672016(11)   | 0.909785 | 0.242418 | 0.6225 |
| rs13006529(2)  | rs5030545(4)   | 0.858009 | 0.229101 | 0.6322 |
| rs672016(11)   | rs3181304(19)  | 1.11736  | 0.219557 | 0.6394 |
| rs4647610(4)   | rs17090911(10) | 0.907477 | 0.209144 | 0.6474 |
| rs6704688(2)   | rs506601(11)   | 0.899519 | 0.208401 | 0.648  |
| rs2293554(2)   | rs507879(11)   | 0.910629 | 0.198247 | 0.6561 |
| rs4233532(1)   | rs3181304(19)  | 1.09429  | 0.192432 | 0.6609 |
| rs13006529(2)  | rs672016(11)   | 1.18713  | 0.192105 | 0.6612 |
| rs4233532(1)   | rs12613347(2)  | 0.890036 | 0.174265 | 0.6763 |
| rs2705897(4)   | rs3181304(19)  | 0.904446 | 0.167317 | 0.6825 |
| rs6704688(2)   | rs507879(11)   | 0.899691 | 0.154929 | 0.6939 |
| rs1052576(1)   | rs2293554(2)   | 1.06852  | 0.152535 | 0.6961 |
| rs12613347(2)  | rs13006529(2)  | 1.1629   | 0.141733 | 0.7066 |
| rs2293554(2)   | rs4647610(4)   | 0.922943 | 0.140313 | 0.708  |
| rs2705897(4)   | rs17090911(10) | 1.06805  | 0.132593 | 0.7158 |
| rs4233532(1)   | rs1052576(1)   | 1.06596  | 0.132095 | 0.7163 |
| rs4233532(1)   | rs547584(11)   | 0.919935 | 0.130972 | 0.7174 |
| rs2293554(2)   | rs17090911(10) | 1.06189  | 0.130084 | 0.7183 |
| rs1052576(1)   | rs12613347(2)  | 0.926385 | 0.122169 | 0.7267 |
| rs12613347(2)  | rs2227310(10)  | 0.930578 | 0.119546 | 0.7295 |
| rs547584(11)   | rs3181304(19)  | 0.912289 | 0.105917 | 0.7448 |
| rs4647610(4)   | rs506601(11)   | 0.928054 | 0.086357 | 0.7689 |
| rs1052576(1)   | rs3181304(19)  | 1.05884  | 0.078827 | 0.7789 |
| rs4233532(1)   | rs5030545(4)   | 1.04713  | 0.076873 | 0.7816 |
| rs13006529(2)  | rs507879(11)   | 0.894779 | 0.07357  | 0.7862 |
| rs1052576(1)   | rs5030545(4)   | 1.04652  | 0.072894 | 0.7872 |
| rs4647610(4)   | rs547584(11)   | 0.92635  | 0.068305 | 0.7938 |
| rs2293554(2)   | rs2227310(10)  | 1.04372  | 0.056335 | 0.8124 |
| rs2293554(2)   | rs2705897(4)   | 0.956494 | 0.055674 | 0.8135 |
| rs547584(11)   | rs507879(11)   | 0.943973 | 0.043625 | 0.8346 |
| rs12613347(2)  | rs2293554      | 1.04787  | 0.04347  | 0.8348 |
| rs4233532(1)   | rs17090911     | 1.03513  | 0.038046 | 0.8454 |
| rs4647610(4)   | rs2227310      | 1.0509   | 0.03661  | 0.8483 |
| rs5030545(4)   | rs3181304(19)  | 1.03532  | 0.029558 | 0.8635 |
| rs17090911(10) | rs2227310      | 0.972697 | 0.023296 | 0.8787 |
| rs4647610(4)   | rs3181304(19)  | 1.04422  | 0.022803 | 0.88   |
| rs2227310(10)  | rs507879(11)   | 1.03331  | 0.020342 | 0.8866 |
| rs17090911(10) | rs3181304(19)  | 1.02568  | 0.016447 | 0.898  |
| rs12613347(2)  | rs17090911(10) | 0.975234 | 0.014048 | 0.9057 |
| rs2705897(4)   | rs506601(11)   | 1.02578  | 0.013461 | 0.9076 |
| rs5030545(4)   | rs2705897(4)   | 1.02122  | 0.012416 | 0.9113 |
| rs12613347(2)  | rs2705897(4)   | 0.973098 | 0.008896 | 0.9249 |
| rs12613347(2)  | rs5030545(4)   | 1.01575  | 0.006178 | 0.9373 |

|                |                |          |          |        |
|----------------|----------------|----------|----------|--------|
| rs1052576(1)   | rs506601(11)   | 0.985625 | 0.006125 | 0.9376 |
| rs4233532(1)   | rs2282659(11)  | 1.01487  | 0.001887 | 0.9653 |
| rs1052576(1)   | rs4647610(4)   | 0.993118 | 0.001114 | 0.9734 |
| rs17090911(10) | rs506601(11)   | 1.00553  | 0.000881 | 0.9763 |
| rs4233532(1)   | rs2293554(2)   | 1.00453  | 0.000687 | 0.9791 |
| rs5030545(4)   | rs17090911(10) | 0.997939 | 0.000149 | 0.9902 |

---

SNP, single nucleotide polymorphism; Chr, Chromosome of single nucleotide polymorphism; OR\_INT, Odds ratio for interaction; P, p-value

Table S4. Non-significant results of inter-gene interaction analysis of samples less than 40 years old

| SNP1          | SNP2           | OR_INT   | Chi-square | P       |
|---------------|----------------|----------|------------|---------|
| rs4233532(1)  | rs1052576(1)   | 0.500484 | 4.95215    | 0.02606 |
| rs4233532     | rs12613347(2)  | 0.73771  | 1.0474     | 0.3061  |
| rs4233532     | rs13006529(2)  | 1.56987  | 1.25533    | 0.2625  |
| rs4233532     | rs6704688(2)   | 1.29167  | 0.464027   | 0.4957  |
| rs4233532     | rs2293554(2)   | 0.879576 | 0.193231   | 0.6602  |
| rs4233532     | rs5030545(4)   | 0.732309 | 0.278148   | 0.5979  |
| rs4233532     | rs2705897(4)   | 0.754532 | 0.509995   | 0.4751  |
| rs4233532     | rs4647610(4)   | 1.14684  | 0.172763   | 0.6777  |
| rs4233532     | rs17090911(10) | 1.91367  | 1.82988    | 0.1761  |
| rs4233532     | rs2227310(10)  | 1.81878  | 3.9662     | 0.04642 |
| rs4233532     | rs506601(11)   | 1.07334  | 0.048857   | 0.8251  |
| rs4233532     | rs547584(11)   | 1.26819  | 0.340463   | 0.5596  |
| rs4233532     | rs672016(11)   | 1.01436  | 0.001817   | 0.966   |
| rs4233532     | rs507879(11)   | 1.25217  | 0.408887   | 0.5225  |
| rs4233532     | rs2282659(11)  | 1.17881  | 0.238953   | 0.625   |
| rs4233532     | rs3181304(19)  | 1.13988  | 0.202368   | 0.6528  |
| rs1052576(1)  | rs12613347(2)  | 0.734111 | 1.1166     | 0.2907  |
| rs1052576     | rs13006529(2)  | 1.51724  | 1.00963    | 0.315   |
| rs1052576     | rs6704688(2)   | 1.28636  | 0.426095   | 0.5139  |
| rs1052576     | rs2293554(2)   | 0.824896 | 0.410874   | 0.5215  |
| rs1052576     | rs5030545(4)   | 0.882317 | 0.04303    | 0.8357  |
| rs1052576     | rs2705897(4)   | 0.940507 | 0.026431   | 0.8709  |
| rs1052576     | rs4647610(4)   | 1.2279   | 0.354878   | 0.5514  |
| rs1052576     | rs17090911(10) | 1.49908  | 0.786605   | 0.3751  |
| rs1052576     | rs2227310(10)  | 1.74155  | 3.31136    | 0.0688  |
| rs1052576     | rs506601(11)   | 1.1119   | 0.107367   | 0.7432  |
| rs1052576     | rs547584(11)   | 1.18366  | 0.177944   | 0.6731  |
| rs1052576     | rs672016(11)   | 1.06869  | 0.036367   | 0.8488  |
| rs1052576     | rs507879(11)   | 1.22373  | 0.316181   | 0.5739  |
| rs1052576     | rs2282659(11)  | 1.1632   | 0.196556   | 0.6575  |
| rs1052576     | rs3181304(19)  | 0.956704 | 0.023143   | 0.8791  |
| rs12613347(2) | rs13006529(2)  | 1.07681  | 0.018346   | 0.8923  |
| rs12613347    | rs6704688(2)   | 0.711423 | 0.558274   | 0.455   |
| rs12613347    | rs2293554(2)   | 0.714423 | 1.20181    | 0.273   |
| rs12613347    | rs5030545(4)   | 1.39516  | 0.27832    | 0.5978  |
| rs12613347    | rs2705897(4)   | 1.35253  | 0.501609   | 0.4788  |
| rs12613347    | rs4647610(4)   | 0.968516 | 0.010871   | 0.917   |
| rs12613347    | rs17090911(10) | 0.43267  | 2.0747     | 0.1498  |
| rs12613347    | rs2227310(10)  | 0.979232 | 0.006084   | 0.9378  |
| rs12613347    | rs506601(11)   | 1.31798  | 0.69494    | 0.4045  |
| rs12613347    | rs547584(11)   | 0.748639 | 0.533255   | 0.4652  |
| rs12613347    | rs672016(11)   | 1.42123  | 1.1606     | 0.2813  |



|               |                |          |          |          |
|---------------|----------------|----------|----------|----------|
| rs12613347    | rs507879(11)   | 1.57541  | 1.38588  | 0.2391   |
| rs12613347    | rs2282659(11)  | 1.47615  | 1.11482  | 0.291    |
| rs12613347    | rs3181304(19)  | 1.11002  | 0.131173 | 0.7172   |
| rs13006529(2) | rs6704688(2)   | 4.84722  | 8.89996  | 0.002852 |
| rs13006529    | rs2293554(2)   | 0.879058 | 0.074297 | 0.7852   |
| rs13006529    | rs5030545(4)   | 0.534802 | 0.969065 | 0.3249   |
| rs13006529    | rs2705897(4)   | 0.419086 | 3.33315  | 0.0679   |
| rs13006529    | rs4647610(4)   | 0.59357  | 1.82545  | 0.1767   |
| rs13006529    | rs17090911(10) | 0.431271 | 1.65213  | 0.1987   |
| rs13006529    | rs2227310(10)  | 1.34796  | 0.579206 | 0.4466   |
| rs13006529    | rs506601(11)   | 0.723868 | 0.590365 | 0.4423   |
| rs13006529    | rs547584(11)   | 0.906464 | 0.04475  | 0.8325   |
| rs13006529    | rs672016(11)   | 1.32243  | 0.422269 | 0.5158   |
| rs13006529    | rs507879(11)   | 0.341075 | 3.14966  | 0.07594  |
| rs13006529    | rs2282659(11)  | 0.34197  | 3.92804  | 0.04749  |
| rs13006529    | rs3181304(19)  | 0.829898 | 0.315742 | 0.5742   |
| rs6704688(2)  | rs2293554(2)   | 0.768402 | 0.325137 | 0.5685   |
| rs6704688     | rs5030545(4)   | 0.872099 | 0.073418 | 0.7864   |
| rs6704688     | rs2705897(4)   | 0.492185 | 2.2981   | 0.1295   |
| rs6704688     | rs4647610(4)   | 0.604051 | 1.76515  | 0.184    |
| rs6704688     | rs17090911(10) | 0.687349 | 0.320075 | 0.5716   |
| rs6704688     | rs2227310(10)  | 1.62567  | 1.69793  | 0.1926   |
| rs6704688     | rs506601(11)   | 1.08835  | 0.043105 | 0.8355   |
| rs6704688     | rs547584(11)   | 1.08547  | 0.032909 | 0.856    |
| rs6704688     | rs672016(11)   | 0.836206 | 0.181155 | 0.6704   |
| rs6704688     | rs507879(11)   | 0.390537 | 2.52758  | 0.1119   |
| rs6704688     | rs2282659(11)  | 0.339471 | 4.27468  | 0.03868  |
| rs6704688     | rs3181304(19)  | 1.05008  | 0.022479 | 0.8808   |
| rs2293554(2)  | rs5030545(4)   | 0.947435 | 0.008905 | 0.9248   |
| rs2293554     | rs2705897(4)   | 1.53725  | 0.826111 | 0.3634   |
| rs2293554     | rs4647610(4)   | 2.45224  | 5.22077  | 0.02232  |
| rs2293554     | rs17090911(10) | 1.75171  | 1.02167  | 0.3121   |
| rs2293554     | rs2227310(10)  | 0.653939 | 2.06846  | 0.1504   |
| rs2293554     | rs506601(11)   | 0.896776 | 0.105223 | 0.7456   |
| rs2293554     | rs547584(11)   | 0.746584 | 0.482849 | 0.4871   |
| rs2293554     | rs672016(11)   | 0.694509 | 0.979045 | 0.3224   |
| rs2293554     | rs507879(11)   | 1.14932  | 0.095373 | 0.7575   |
| rs2293554     | rs2282659(11)  | 0.952456 | 0.013004 | 0.9092   |
| rs2293554     | rs3181304(19)  | 1.19779  | 0.301538 | 0.5829   |
| rs5030545(4)  | rs2705897(4)   | 0.122696 | 6.1767   | 0.01294  |
| rs5030545     | rs4647610(4)   | 0.243778 | 4.60466  | 0.03189  |
| rs5030545     | rs17090911(10) | 0.08234  | 4.04946  | 0.04419  |
| rs5030545     | rs2227310(10)  | 0.962213 | 0.0052   | 0.9425   |
| rs5030545     | rs506601(11)   | 0.39033  | 2.3118   | 0.1284   |

|                |                |          |          |         |
|----------------|----------------|----------|----------|---------|
| rs5030545      | rs547584(11)   | 0.631523 | 0.524085 | 0.4691  |
| rs5030545      | rs672016(11)   | 1.19673  | 0.070024 | 0.7913  |
| rs5030545      | rs507879(11)   | 0.498419 | 0.98531  | 0.3209  |
| rs5030545      | rs2282659(11)  | 0.43848  | 1.2635   | 0.261   |
| rs5030545      | rs3181304(19)  | 1.6296   | 0.855262 | 0.3551  |
| rs2705897(4)   | rs4647610(4)   | 0.484373 | 1.98496  | 0.1589  |
| rs2705897      | rs17090911(10) | 2.27607  | 1.35217  | 0.2449  |
| rs2705897      | rs2227310(10)  | 0.972657 | 0.005684 | 0.9399  |
| rs2705897      | rs506601(11)   | 0.476877 | 2.37964  | 0.1229  |
| rs2705897      | rs547584(11)   | 1.33447  | 0.291701 | 0.5891  |
| rs2705897      | rs672016(11)   | 1.48406  | 0.679833 | 0.4096  |
| rs2705897      | rs507879(11)   | 2.00798  | 1.65796  | 0.1979  |
| rs2705897      | rs2282659(11)  | 1.64458  | 0.871117 | 0.3506  |
| rs2705897      | rs3181304(19)  | 1.36572  | 0.584167 | 0.4447  |
| rs4647610(4)   | rs17090911(10) | 1.42186  | 0.323734 | 0.5694  |
| rs4647610      | rs2227310(10)  | 0.816066 | 0.474276 | 0.491   |
| rs4647610      | rs506601(11)   | 0.905952 | 0.081215 | 0.7757  |
| rs4647610      | rs547584(11)   | 2.90082  | 5.91442  | 0.01502 |
| rs4647610      | rs672016(11)   | 0.720905 | 0.764754 | 0.3818  |
| rs4647610      | rs507879(11)   | 1.19126  | 0.185494 | 0.6667  |
| rs4647610      | rs2282659(11)  | 1.04906  | 0.012767 | 0.91    |
| rs4647610      | rs3181304(19)  | 0.72408  | 1.02716  | 0.3108  |
| rs17090911(10) | rs2227310(10)  | 2.70373  | 2.03556  | 0.1537  |
| rs17090911     | rs506601(11)   | 0.771371 | 0.210723 | 0.6462  |
| rs17090911     | rs547584(11)   | 2.07633  | 1.23449  | 0.2665  |
| rs17090911     | rs672016(11)   | 0.519881 | 0.880569 | 0.348   |
| rs17090911     | rs507879(11)   | 0.486573 | 1.22749  | 0.2679  |
| rs17090911     | rs2282659(11)  | 0.402489 | 2.10914  | 0.1464  |
| rs17090911     | rs3181304(19)  | 1.40962  | 0.42489  | 0.5145  |
| rs2227310(10)  | rs506601(11)   | 1.76568  | 3.09483  | 0.07854 |
| rs2227310      | rs547584(11)   | 0.858374 | 0.172843 | 0.6776  |
| rs2227310      | rs672016(11)   | 0.837395 | 0.31308  | 0.5758  |
| rs2227310      | rs507879(11)   | 1.00771  | 0.000484 | 0.9824  |
| rs2227310      | rs2282659(11)  | 1.11905  | 0.105355 | 0.7455  |
| rs2227310      | rs3181304(19)  | 0.860497 | 0.280645 | 0.5963  |
| rs506601(11)   | rs547584(11)   | 0.806561 | 0.172772 | 0.6777  |
| rs506601       | rs672016(11)   | 1.00063  | 2.21E-06 | 0.9988  |
| rs506601       | rs507879(11)   | 0.529358 | 2.17754  | 0.14    |
| rs506601       | rs2282659(11)  | 0.763929 | 0.418763 | 0.5176  |
| rs506601       | rs3181304(19)  | 1.23987  | 0.498552 | 0.4801  |
| rs547584(11)   | rs672016(11)   | 0.863507 | 0.133784 | 0.7145  |
| rs547584       | rs507879(11)   | 1.47352  | 0.650569 | 0.4199  |
| rs547584       | rs2282659(11)  | 1.1109   | 0.049946 | 0.8232  |
| rs547584       | rs3181304(19)  | 1.13195  | 0.097502 | 0.7548  |

|               |               |          |          |        |
|---------------|---------------|----------|----------|--------|
| rs672016(11)  | rs507879(11)  | 1.53528  | 1.21598  | 0.2702 |
| rs672016      | rs2282659(11) | 1.58462  | 1.4465   | 0.2291 |
| rs672016      | rs3181304(19) | 1.00935  | 0.000831 | 0.977  |
| rs507879(11)  | rs2282659(11) | 1.02664  | 0.00335  | 0.9538 |
| rs507879      | rs3181304(19) | 0.784872 | 0.482715 | 0.4872 |
| rs2282659(11) | rs3181304(19) | 0.818834 | 0.324664 | 0.5688 |

---

SNP, single nucleotide polymorphism; Chr, Chromosome of single nucleotide polymorphism; OR\_INT, Odds ratio for interaction; P, p-value

Table S5 The single SNP association studies of CASP7 in psoriasis cases and controls in GWAS.

| ID    | SNP ID     | Chr | Chr       | P-value | Rank  | pHWE    | pHWE      | Call rate | Call rate | Odds   |
|-------|------------|-----|-----------|---------|-------|---------|-----------|-----------|-----------|--------|
|       |            | ID  | Position  |         |       | (case)  | (control) | (case)    | (control) | ratio  |
| 34782 | rs4457708  | 10  | 113710233 | 0.03832 | 35791 | 0.03107 | 0.3636    | 1         | 1         | 0.8732 |
| 34783 | rs10749143 | 10  | 113715870 | 0.03763 | 35221 | 0.03981 | 0.5       | 1         | 1         | 0.8732 |
| 34784 | rs11196449 | 10  | 113720823 | 0.03434 | 32394 | 0.7336  | 0.5441    | 1         | 0.999294  | 0.8881 |
| 34785 | rs11196454 | 10  | 113733974 | 0.04284 | 39777 | 0.3063  | 0.5788    | 0.999301  | 0.999294  | 1.144  |

Table S6 The single SNP association studies of CASP8 in psoriasis cases and controls in GWAS.

| SNP ID     | Chr | Chr Position | P-value | Rank  | pHWE   | pHWE      | Call rate | Call rate | Odds  |
|------------|-----|--------------|---------|-------|--------|-----------|-----------|-----------|-------|
|            | ID  |              |         |       | (case) | (control) | (case)    | (control) | ratio |
| rs13402616 | 2   | 201255044    | 0.03893 | 36339 | 0.8491 | 0.8177    | 0.999301  | 0.999294  | 1.253 |
| rs16836969 | 2   | 201253542    | 0.0279  | 26729 | 1      | 1         | 1         | 1         | 1.408 |
| rs6743518  | 2   | 201231548    | 0.04506 | 41633 | 1      | 0.3983    | 1         | 0.999294  | 1.345 |

GWAS, Genome-wide association study
