# Supplementary material for: Association Study of the Caspase Gene Family and Psoriasis Vulgaris Susceptibility in Northeastern China
Source: Biomed Res Int. 2019 Feb 17;2019:2417612. doi: 10.1155/2019/2417612 (PMC6398065; doi:10.1155/2019/2417612)
Supplement: Supplementary Materials — The supplementary materials contain several experimental data and experimental results that are closely related to the content of the manuscript. They are relatively unimportant or large or negative results, but they are still very meaningful for manuscripts. [file 2417612.f1.zip]

Archive with 3 entries (2 files):
- 2417612.f1/
- 2417612.f1/PDF file of the Supplementary material_BMRI_2661541.pdf
- 2417612.f1/Source file of the final accepted Supplementary material_BMRI_2661540.docx
